# Supplementary material
Source: PubMed Central journal article supplement (PMC7260003)
Supplement: jci-130-128073-s069.pdf [file jci-130-128073-s069.pdf]

**Hepatic Slug epigenetically promotes liver lipogenesis, fatty liver disease, and type 2 diabetes**

Yan Liu, Haiyan Lin, Lin Jiang, Qingsen Shang, Yin Lei, Jiandie Lin, Wen-Shu Wu, Liangyou Rui

Supplementary information

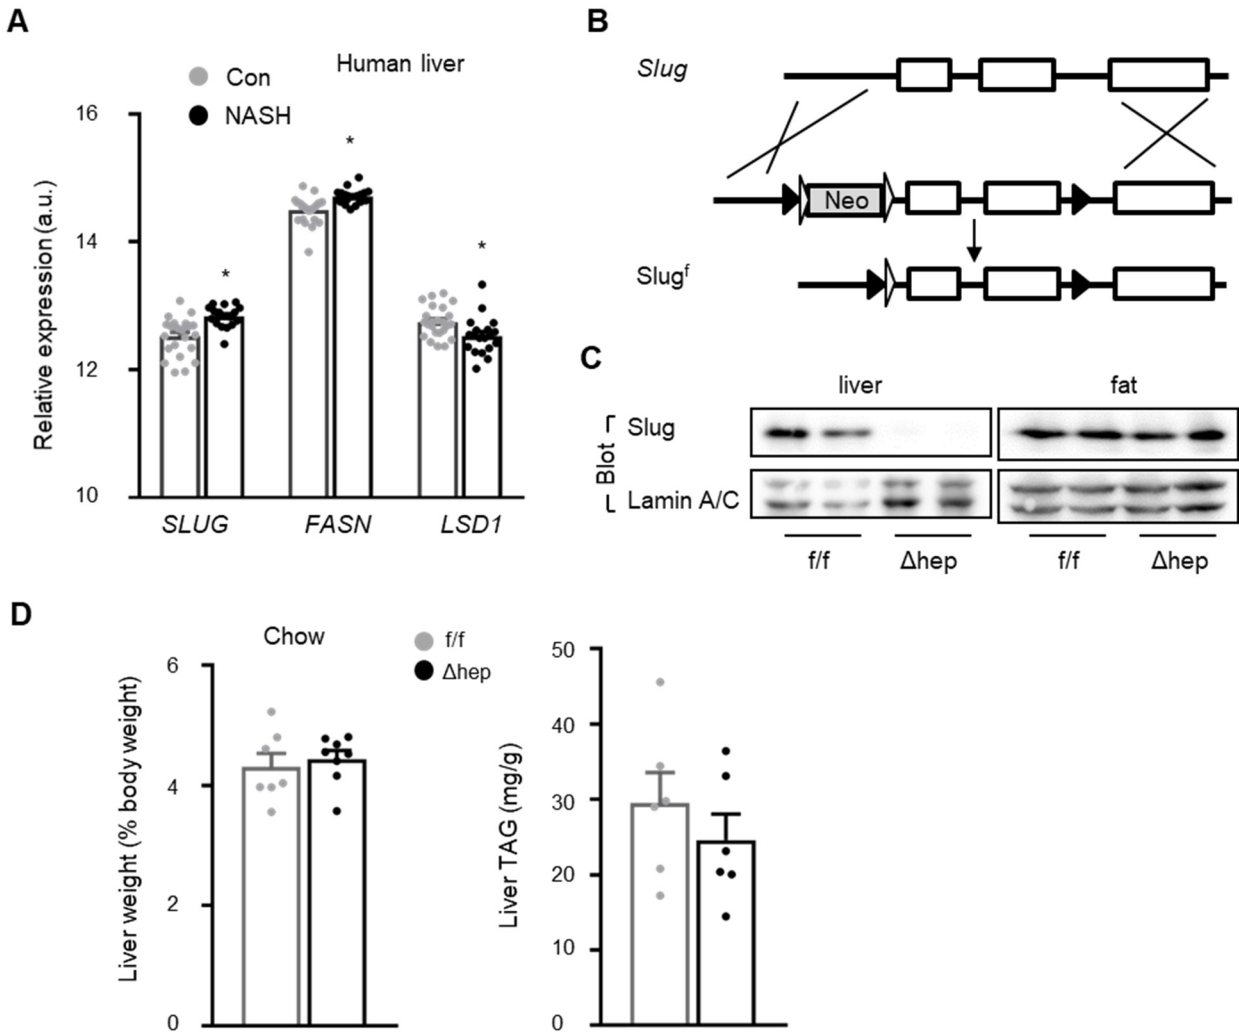

**Supplemental Figure 1. Hepatocyte-specific deletion of hepatic *Snai2* in mice.** (A) SLUG, FASN and LSD1 expression profile information was retrieved from RNA-seq GSE89632 datasets (<https://www.ncbi.nlm.nih.gov/geo/query/acc.cgi?acc=GSE89632>) using GEO2R tools and illumina ID ILMN\_1655740 (SLUG), ILMN\_1784871(FASN), and ILMN\_1813840 (LSD1). Retrieved SLUG, FASN and LSD1 expression values were statistically analyzed. Con: n=24, NASH: n=19. (B) Schematic representation of *Slug*<sup>f/f</sup> allele. (C) Nuclear extracts were prepared from fat and liver and immunoblotted with antibodies against Slug and lamin A/C. (D) *Slug*<sup>Δhep</sup> (n=7) and *Slug*<sup>f/f</sup> (n=8) male mice were fed a standard chow diet for 18 weeks. Liver/body weight ratios, liver TAG and levels (normalized to liver weight) were measured. Data are presented as mean ± SEM. Data are presented as mean ± SEM. \*p<0.05, 2-tailed unpaired Student's *t* test.

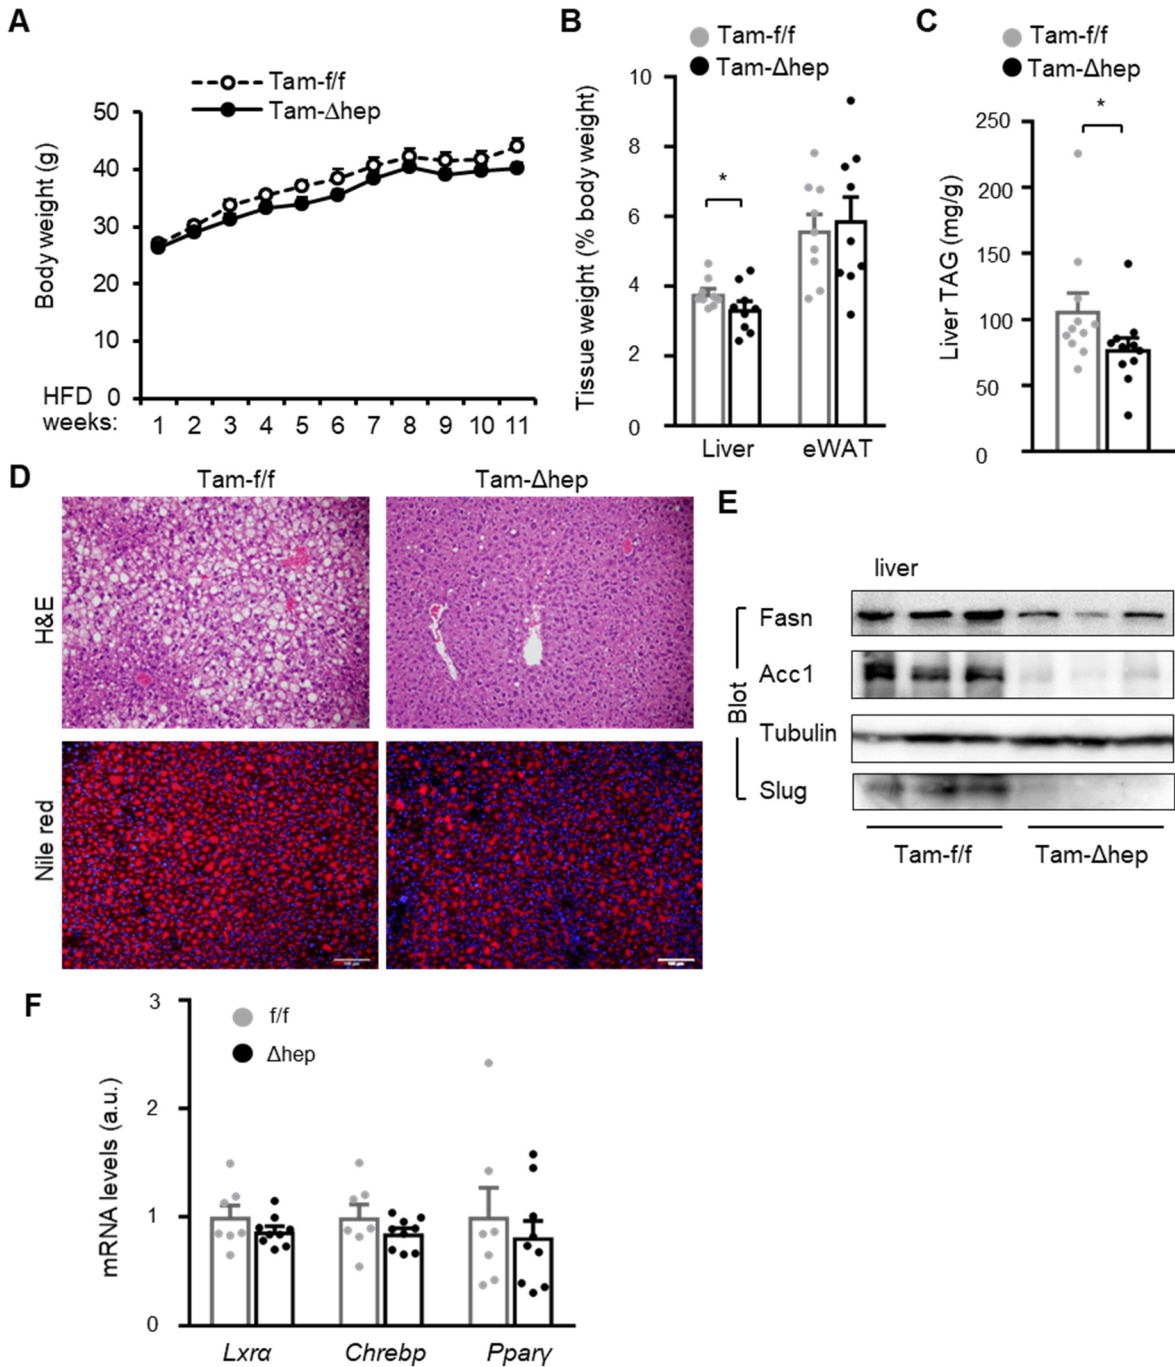

**Supplemental Figure 2. Deletion of hepatic *Slug* protects against liver steatosis in obesity.** Tam-f/f (n=10) and Tam-Δhep (n=10) male mice (7 weeks) were fed a HFD for 11 weeks and euthanized under randomly fed conditions. **(A)** Growth curves. **(B)** Liver/body weight and epididymal WAT/body weight ratios. **(C)** Liver TAG levels (normalized to liver weight). **(D)** Representative liver sections (4 pairs). **(E)** Liver extracts were immunoblotted with the indicated antibodies. *Slug* and other proteins were resolved in parallel gels. **(F)** *Slug*<sup>Δhep</sup> (n=9) and *Slug*<sup>f/f</sup> (n=7) males were fed a HFD for 11 weeks. Liver mRNA abundance was measured by qPCR (normalized to 34B4 levels). Data are presented as mean ± SEM. \*p<0.05, 2-tailed unpaired Student's *t* test.

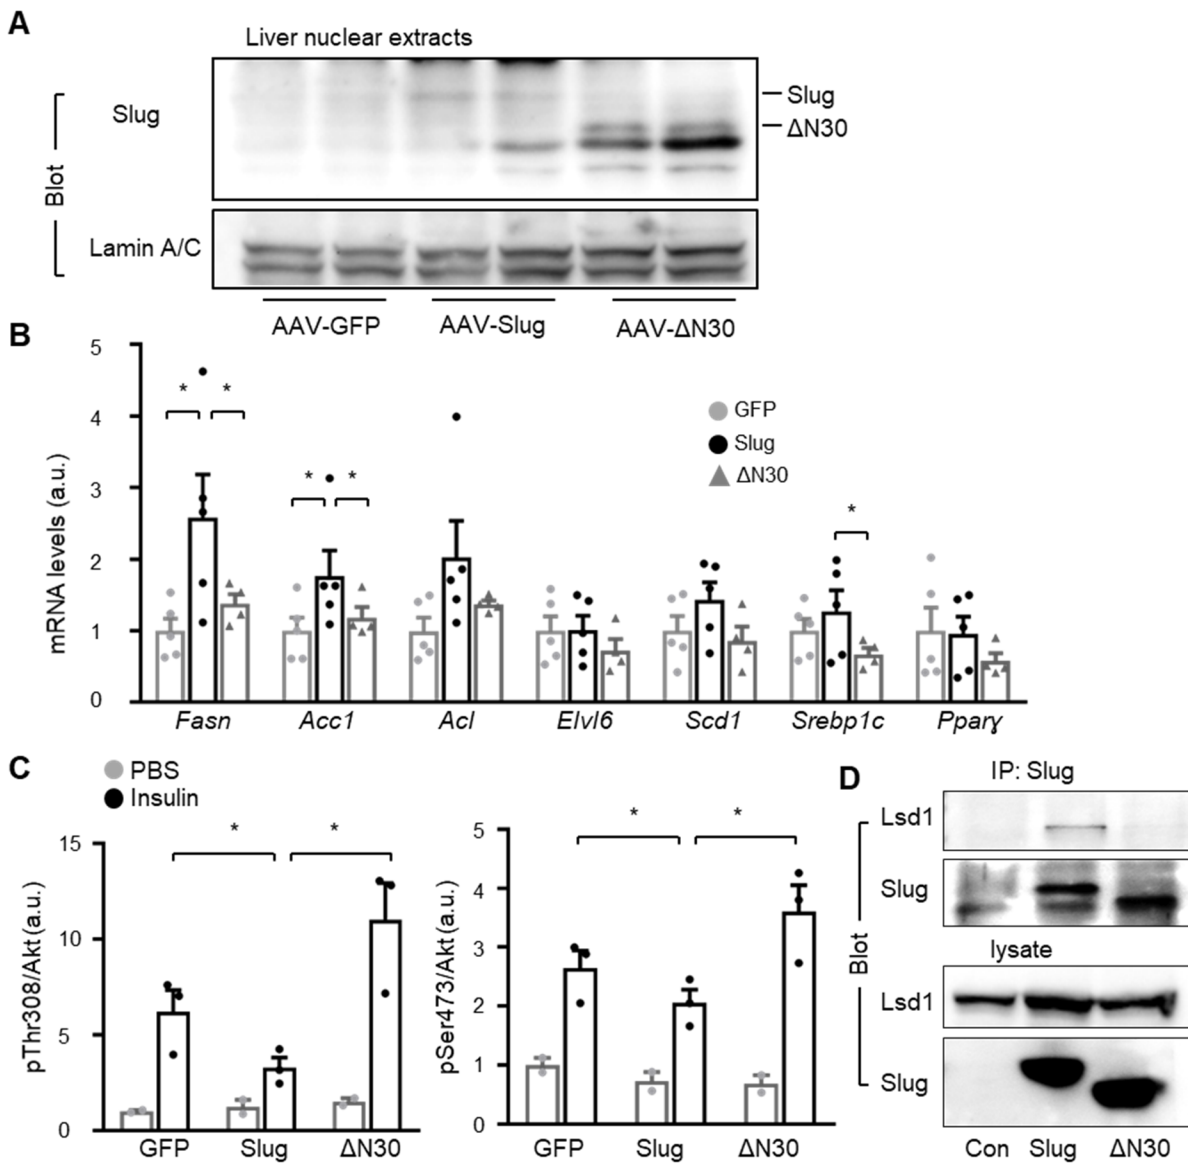

**Supplemental Figure 3. Liver-specific overexpression of Slug but not epigenetic defective  $\Delta$ N30 promotes liver steatosis.** (A) C57BL/6J mice were transduced with the indicated AAV vectors for 3 weeks. Liver nuclear extracts were immunoblotted with the indicated antibodies. (B-C) C57BL/6 male mice were transduced with AAV-GFP, -Slug, or - $\Delta$ N30 vectors via tail vein injection, and then fed a HFD for 11 weeks. (B) Mice were fasted overnight and stimulated with insulin (1 unit/kg body weight, iv) for 5 min. Livers extracts were immunoblotted with phospho-Akt (pThr308 and pSer473). Akt phosphorylation was quantified and normalized to total Akt levels. GFP: n=3, Slug: n=3,  $\Delta$ N3: n=3. (C) Liver gene expression (normalized to 36B4 expression). GFP: n=5, Slug: n=5,  $\Delta$ N3: n=4. (D) Lsd1 was coexpressed with Slug or  $\Delta$ N30 in HEK293 cells. Cell extracts were immunoprecipitated with anti-Slug antibody and immunoblotted with anti-Lsd1 or Slug antibodies. Data are presented as mean  $\pm$  SEM. \*p<0.05, 2-tailed unpaired Student's *t* test.

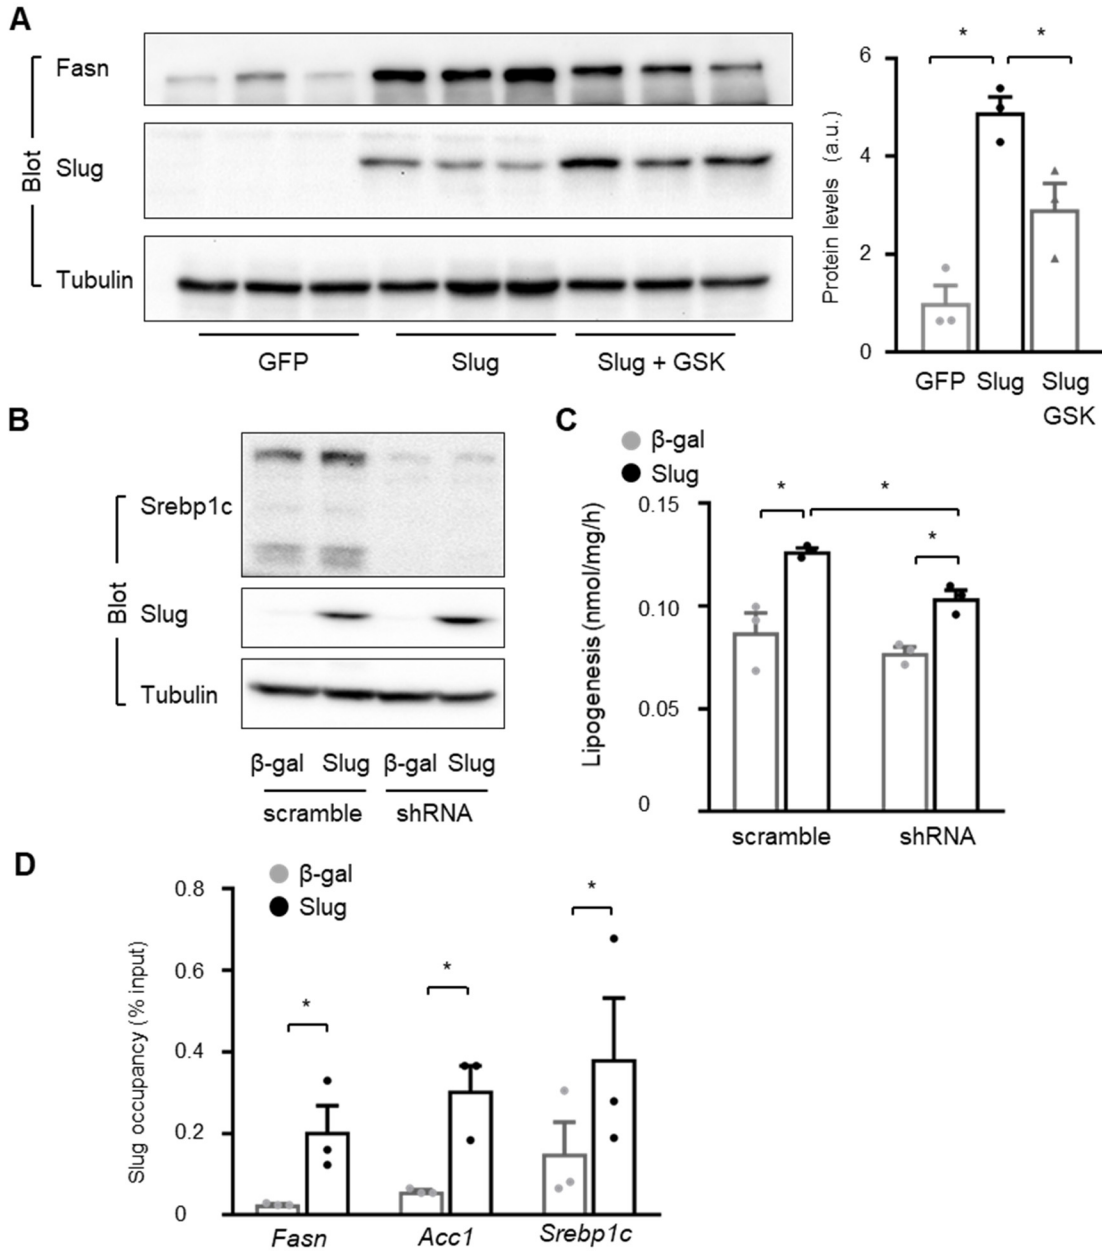

**Supplemental Figure 4. Lsd1 mediates Slug lipogenic function in the liver. (A)** C57BL/6J male mice were transduced with GFP or Slug adenoviral vectors and treated with GSK or empty vehicles (control). Liver extracts were prepared 5 days after GSK treatment and immunoblotted with the indicated antibodies. Fasn levels were normalized to  $\alpha$ -tubulin levels. **(B-C)** Mouse primary hepatocytes were transduced with the indicated adenoviral vectors for 3 days. **(B)** Cell extracts were immunoblotted with the indicated antibodies. **(C)** *De novo* lipogenesis assays were performed on these cells (n=3 per group). **(D)** Primary hepatocytes were transduced with Slug or  $\beta$ -gal adenoviral vectors. Slug occupancy on the *Fasn*, *Acc1*, and *Srebp1c* promoters was assessed by ChIP-qPCR and normalized to inputs (n=3 per group). Data are presented as mean  $\pm$  SEM. \*p<0.05, 2-tailed unpaired Student's *t* test.

| ANTIBODY          | SOURCE                    | IDENTIFIER | DILUTION |
|-------------------|---------------------------|------------|----------|
| Slug              | ABclonal Technology       | A1057      | 1:600    |
| Slug              | Cell Signaling Technology | #9585      | 1:1000   |
| Lamin A/C         | Cell Signaling Technology | #4777      | 1:2000   |
| p-Akt (pThr308)   | Cell Signaling Technology | #13038     | 1:5000   |
| p-Akt (pSer473)   | Cell Signaling Technology | #4060      | 1:5000   |
| Akt               | Cell Signaling Technology | #4685      | 1:2000   |
| $\alpha$ -tubulin | Santa Cruz                | sc-5286    | 1:10000  |
| Fasn              | Cell Signaling Technology | #3180      | 1:5000   |
| Acc1              | Cell Signaling Technology | #3676      | 1:5000   |
| Acl               | Cell Signaling Technology | #13390     | 1:5000   |
| H3K9me1           | Cell Signaling Technology | #14186     | 1:200    |
| H3K9me2           | Cell Signaling Technology | #4658      | 1:200    |
| H3K4me2           | Cell Signaling Technology | #9725      | 1:200    |
| Lsd1              | Cell Signaling Technology | #2184      | 1:3000   |
| Ubiquitin         | Santa Cruz                | sc-8017    | 1:1000   |
| Srebp-1c          | Santa Cruz                | Sc-13551   | 1:500    |

**Supplemental Table 1. Antibody list**

| <b>Genes</b>         | <b>Forward</b>          | <b>Reverse</b>          |
|----------------------|-------------------------|-------------------------|
| <i>Slug</i> (mouse)  | ATTGCCTTGTGTCTGCAAGAT   | TTTTGGAGCAGTTTTTGCCT    |
| <i>Slug</i> (human)  | ACTGGACACACATACAGTGATT  | GGAGAGAGGCCATTGGGTAG    |
| <i>Fasn</i>          | TTGACGGCTCACACACCTAC    | CGATCTTCCAGGCTCTTCAG    |
| <i>Acc1</i>          | CAGGGACTATGTCCTGAAGCA   | GGAATCCATTGTGGAGAGGA    |
| <i>Srebp-1c</i>      | AACGTCACTTCCAGCTAGAC    | CCACTAAGGTGCCTACAGAGC   |
| <i>Mttp</i>          | CTCCACAGTGCAGTTCTCACA   | AGAGACATATCCCCTGCCTGT   |
| <i>Cpt1a</i>         | CTGATGACGGCTATGGTGTTT   | GTGAGGCCAAACAAGGTGATA   |
| <i>Gck</i>           | GAAAAGATCATTGGCGGAAA    | CCCAGAGTGCTCAGGATCTT    |
| <i>LPK</i>           | GAGGCTTCCTTCAAGTGCTG    | GAGGCTCACGGTAGAGCAAG    |
| <i>Cidea</i>         | ATCACAACCTGGCCTGGTTACG  | TACTACCCGGTGTCCATTCT    |
| <i>Cideb</i>         | GACCCTTCCGTGTCTGTGAT    | GTAGCAGCAAGGTCTCCAGG    |
| <i>Cidec</i>         | CCTATGACCTGCACTGCTACAAG | CATGTAGCTGGAGGTGCCAAG   |
| <i>CD36</i>          | GGAGTGGTGATGTTTGTGCT    | GCACACACCACCATTCTTCT    |
| <i>Chrebp</i>        | CTGGGGACCTAACAGGAGC     | GAAGCCACCCTATAGCTCCC    |
| <i>Elvl6</i>         | AAAGCACCCGAACCTAGGTGACA | ACCAGTGCAGGAAGATCAGTTTC |
| <i>Scd1</i>          | AGGTGCCTCTTAGCCACTGA    | CCAGGAGTTTCTTGGGTGA     |
| <i>Dgat1</i>         | CGTGGTATCCTGAATTGGTG    | GGCGTTCTCAATCTGAAAT     |
| <i>Dgat2</i>         | ATCTTCTCTGTCACCTGGCT    | ACCTTTCTTGGCGTGTTC      |
| <i>Acl</i>           | CCTCAAGGACTTCGTCAAACA   | GCCCATACTCCTTCTAGCAC    |
| <i>34B4</i>          | AAGCGCGTCCTGGCATTGTCT   | CCGCAGGGGCAGCAGTGGT     |
| <i>GAPDH</i> (human) | CGACCACTTTGTCAAGCTCA    | AGGGGTCTACATGGCAACTG    |
| <i>Fasn</i> (ChIP)   | TGCAACCGTAGTCCAACGAG    | GCCTCAGCGGAAGTCATCAG    |
| <i>NCH</i> (ChIP)    | GGATGGCTCCAAGATAAGGCA   | ACAACATCCACACGTCCAGT    |
| <i>Actb</i> (ChIP)   | AATAGCCTCCGCCCTTGTG     | CGTGACATCCACACCCAGA     |
| <i>Acc1</i> (ChIP)   | CCTGGCTGTCCTGGAAATCA    | TTAAATGTTGTCCTTGCCGGG   |

|                       |                       |                       |
|-----------------------|-----------------------|-----------------------|
| <i>Srebp1c</i> (ChIP) | ACACCTCATCTTCTCGCCATC | ATCCCCATCCCCATCTTCTCA |
|-----------------------|-----------------------|-----------------------|

**Supplemental Table 2. Primer list.**
